# Supplementary material
Source: PubMed Central journal article supplement (PMC4429695)
Supplement: mt2014153x1.pdf [file mt2014153x1.pdf]

**Table S1. Summary of primary screen**

| ASO          | %KD               |                   | Selectivity ratio | Tolerability   |      |
|--------------|-------------------|-------------------|-------------------|----------------|------|
|              | wtHTT             | muHTT             |                   | Adverse events | GFAP |
| CTRL1        | induction         | induction         | N/A               | -              | -    |
| <b>CTRL2</b> | <b>negligible</b> | <b>negligible</b> | <b>N/A</b>        | -              | -    |
| PH1          | 81.9±3.5          | 84.9±0.9          | 1.04              | HS             | +    |
| PH2          | 74.3±3.9          | 76.2±4.7          | 1.03              | -              | +    |
| PH3          | 63.2±3.6          | 61.1±9.7          | 0.97              | BWL            | ++   |
| <b>HH1</b>   | <b>81.1±1.5</b>   | <b>83.3±1.5</b>   | <b>1.03</b>       | -              | +/-  |
| A1           | 27±6.3            | 58.5±5.2          | 2.17              | -              | -    |
| A2           | 77.9±2.9          | 93.6±0.8          | 1.20              | -              | ++   |
| <b>A3</b>    | <b>51±7.5</b>     | <b>81.8±3.5</b>   | <b>1.60</b>       | -              | -    |
| B1           | 23.4±5.4          | 55.8±3.4          | 2.38              | -              | -    |
| B3           | ND                | ND                | ND                | NR             | +++  |
| C1           | ND                | ND                | ND                | S, DR          | ++   |
| C2           | 21.9±10           | 46.8±11.9         | 2.13              | DR             | +    |
| C3           | 10.2±9.8          | 27.9±9.6          | 2.73              | HS             | ++   |
| <b>D1</b>    | <b>10.7±7.3</b>   | <b>66.9±3.9</b>   | <b>6.25</b>       | -              | -    |
| D2           | 39.5±5.9          | 76.3±5.3          | 1.93              | -              | +    |
| D3           | ND                | ND                | ND                | NS             | ND   |
| E3           | ND                | ND                | ND                | NR             | ND   |
| F1           | negligible        | negligible        | ND                | S, DR, BWL     | +++  |

n=4, N/A Not applicable, ND Not determined. Adverse events key: -None observed, BWL Body weight loss, DR Decreased surgical recovery, HS Heavy sedation, NR No surgical recovery, NS No survival to time of sacrifice, S Seizures. GFAP key: - No gliosis observed, +/- Very mild gliosis, + Mild gliosis, ++ Gliosis, +++ Strong gliosis. **Bolded ASOs were selected for further study.**

**Table S2. Summary of secondary screen**

| ASO        | %KD             |                 | Selectivity ratio | Tolerability   |      |
|------------|-----------------|-----------------|-------------------|----------------|------|
|            | wtHTT           | muHTT           |                   | Adverse events | GFAP |
| A4         | 29.5±6.3        | 57.2±5.2        | 1.94              | S              | ++   |
| A5         | 12.4±10.7       | 75.3±2.9        | 6.05              | BWL            | ++   |
| A6         | 1.6±5.4         | 85.1±1.2        | 52.65             | S, BWL         | +++  |
| A7         | 2.8±8.8         | 77.3±1.4        | 27.61             | BWL            | ++   |
| A8         | ND              | ND              | ND                | S, NR          | ND   |
| <b>A9</b>  | <b>2.6±5.8</b>  | <b>56.1±5.5</b> | <b>21.34</b>      | -              | +/-  |
| A10        | 2.9±4.3         | 40.1±4.8        | 13.80             | -              | -    |
| A11        | <1.0            | 64.4±5.4        | >64.4             | DS             | +++  |
| A12        | 38.1±11.8       | 85.3±6.8        | 2.24              | -              | +/-  |
| A13        | <1.0            | 69.7±3.1        | >69.7             | DS             | ++   |
| A14        | <1.0            | 67.2±3.4        | >67.2             | DS             | ++   |
| A15        | <1.0            | 70.5±5.1        | >70.6             | DS             | ++   |
| <b>A16</b> | <b>&lt;1.0</b>  | <b>85.4±1.4</b> | <b>&gt;85.4</b>   | -              | -    |
| A17        | <1.0            | 66.7±8.5        | >66.7             | HS, BWL        | ++   |
| <b>A18</b> | <b>6.5±16.2</b> | <b>80.8±2.1</b> | <b>12.36</b>      | -              | +/-  |
| A19        | <1.0            | 70.4±8.7        | >70.4             | HLA            | ++   |
| <b>A20</b> | <b>&lt;1.0</b>  | <b>83.5±1.7</b> | <b>&gt;83.5</b>   | -              | -    |
| <b>A21</b> | <b>&lt;1.0</b>  | <b>73.1±1.1</b> | <b>&gt;73.1</b>   | -              | +/-  |
| A22        | <1.0            | 67.2±0.5        | >67.2             | S, HS, BWL     | +++  |
| <b>A23</b> | <b>&lt;1.0</b>  | <b>78.3±7.3</b> | <b>&gt;78.3</b>   | -              | +/-  |
| D4         | ND              | ND              | ND                | NS             | ND   |
| D5         | ND              | ND              | ND                | DR, NS         | ND   |
| D6         | ND              | ND              | ND                | NS             | ND   |
| <b>G1</b>  | <b>&lt;1.0</b>  | <b>74.3±2.4</b> | <b>&gt;74.3</b>   | -              | -    |
| <b>G2</b>  | <b>&lt;1.0</b>  | <b>67.5±7.9</b> | <b>&gt;67.5</b>   | -              | -    |

n=4, N/A Not applicable, ND Not determined. Adverse events key: -None observed, BWL Body weight loss, DR Decreased surgical recovery, DS Decreased survival to time of sacrifice, HS Heavy sedation, NR No surgical recovery, NS No survival to time of sacrifice, S Seizures. GFAP key: - No gliosis observed, +/- Very mild gliosis, + Mild gliosis, ++ Gliosis, +++ Strong gliosis. **Bolded ASOs were selected for further study.**

**Table S3. Summary of dose response**

| ASO        | ED50           |                 | Fold selectivity | Max KD%        |                 | Tolerability of highest dose |            |
|------------|----------------|-----------------|------------------|----------------|-----------------|------------------------------|------------|
|            | wtHTT          | muHTT           |                  | wtHTT          | muHTT           | Adverse events               | GFAP       |
| HH1        | 63.98±23       | 50.77±24        | 1.26             | 83.2±1.3       | 83.3±1.5        | HS                           | +/-        |
| A9         | >500           | 170±94          | >2.31            | 48.7±0.4       | 79.3±1.2        | HS, BWL                      | ++         |
| <b>A16</b> | <b>&gt;500</b> | <b>48.3±16</b>  | <b>&gt;10.34</b> | <b>3.6±3.8</b> | <b>86.1±1.4</b> | <b>HS</b>                    | <b>+/-</b> |
| A18        | >500           | 104.5±26        | >4.51            | <1.0           | 85.5±3.3        | HS, HLA                      | ++         |
| <b>A20</b> | <b>&gt;500</b> | <b>93.3±41</b>  | <b>&gt;5.36</b>  | <b>7.8±8.8</b> | <b>85.9±1.4</b> | <b>HS</b>                    | <b>+/-</b> |
| <b>A21</b> | <b>&gt;500</b> | <b>101.6±47</b> | <b>&gt;4.92</b>  | <b>&lt;1.0</b> | <b>79.7±2.9</b> | <b>HS</b>                    | <b>+/-</b> |
| A23        | >500           | 37.8±13         | >13.24           | <1.0           | 86.4±1.6        | S, HLA                       | +          |
| <b>G1</b>  | <b>&gt;500</b> | <b>93.3±62</b>  | <b>&gt;5.36</b>  | <b>&lt;1.0</b> | <b>77.1±2.4</b> | <b>HS</b>                    | <b>-</b>   |
| G2         | >500           | 91.9±85         | >5.44            | <1.0           | 67.5±8.0        | HS                           | -          |

n=4, Adverse events key: BWL Body weight loss, HLA Hind limb ataxia, HS Heavy sedation, S Seizures. GFAP key: - No gliosis observed, +/- Very mild gliosis, + Mild gliosis, ++ Gliosis. **Bolded ASOs are suitable for further pre-clinical validation.**

**Table S4. Summary of tolerability assessment in wildtype animals**

| ASO        | Mouse tolerability |                |              | Rat tolerability   |                |              | GFAP          |
|------------|--------------------|----------------|--------------|--------------------|----------------|--------------|---------------|
|            | Acute tolerability | Adverse events | Body weight  | Acute tolerability | Adverse events | Body weight  |               |
| HH1        | 3±1                | 0              | 103±6        | 1±0.9              | 17             | 89±6         | 112±21        |
| <b>A3</b>  | <b>1±0.5</b>       | <b>0</b>       | <b>102±4</b> |                    |                |              |               |
| D1         | 5±1                | 100            | 105±11       |                    |                |              |               |
| A9         | 0                  | 0              | 100          | 1±0.4              | 17             | 97±2         | 124±54        |
| <b>A16</b> | <b>0</b>           | <b>0</b>       | <b>92±5</b>  | <b>1±0.8</b>       | <b>0</b>       | <b>97±3</b>  | <b>111±22</b> |
| A18        | 0.3±0.5            | 50             | 105±8        |                    |                |              |               |
| <b>A20</b> | <b>0.3±0.5</b>     | <b>0</b>       | <b>101±1</b> | <b>1±0.6</b>       | <b>0</b>       | <b>100±3</b> | <b>90±36</b>  |
| <b>A21</b> | <b>2±1</b>         | <b>0</b>       | <b>100±4</b> | <b>1±0.8</b>       | <b>0</b>       | <b>101±6</b> | <b>128±57</b> |
| A23        | 0                  | 25             | 108±18       |                    |                |              |               |
| <b>G1</b>  | <b>2±1</b>         | <b>0</b>       | <b>102±7</b> | <b>1±1</b>         | <b>0</b>       | <b>95±10</b> | <b>70±60</b>  |
| G2         | 2±1                | 25             | 98±8         |                    |                |              |               |

Mouse tolerability (n=4) and rat tolerability (n=6). Acute tolerability score (0 normal - 7 maximum impairment) mean ± SD, adverse event (AE) reported as % of animals with AE, body weight % change from baseline relative to PBS ± SD, Iba1 and GFAP mRNA level % change from PBS ± SD. Data from A20 reported previously in [28]. **Bolded ASOs met all tolerability criteria.**

Figure S1a

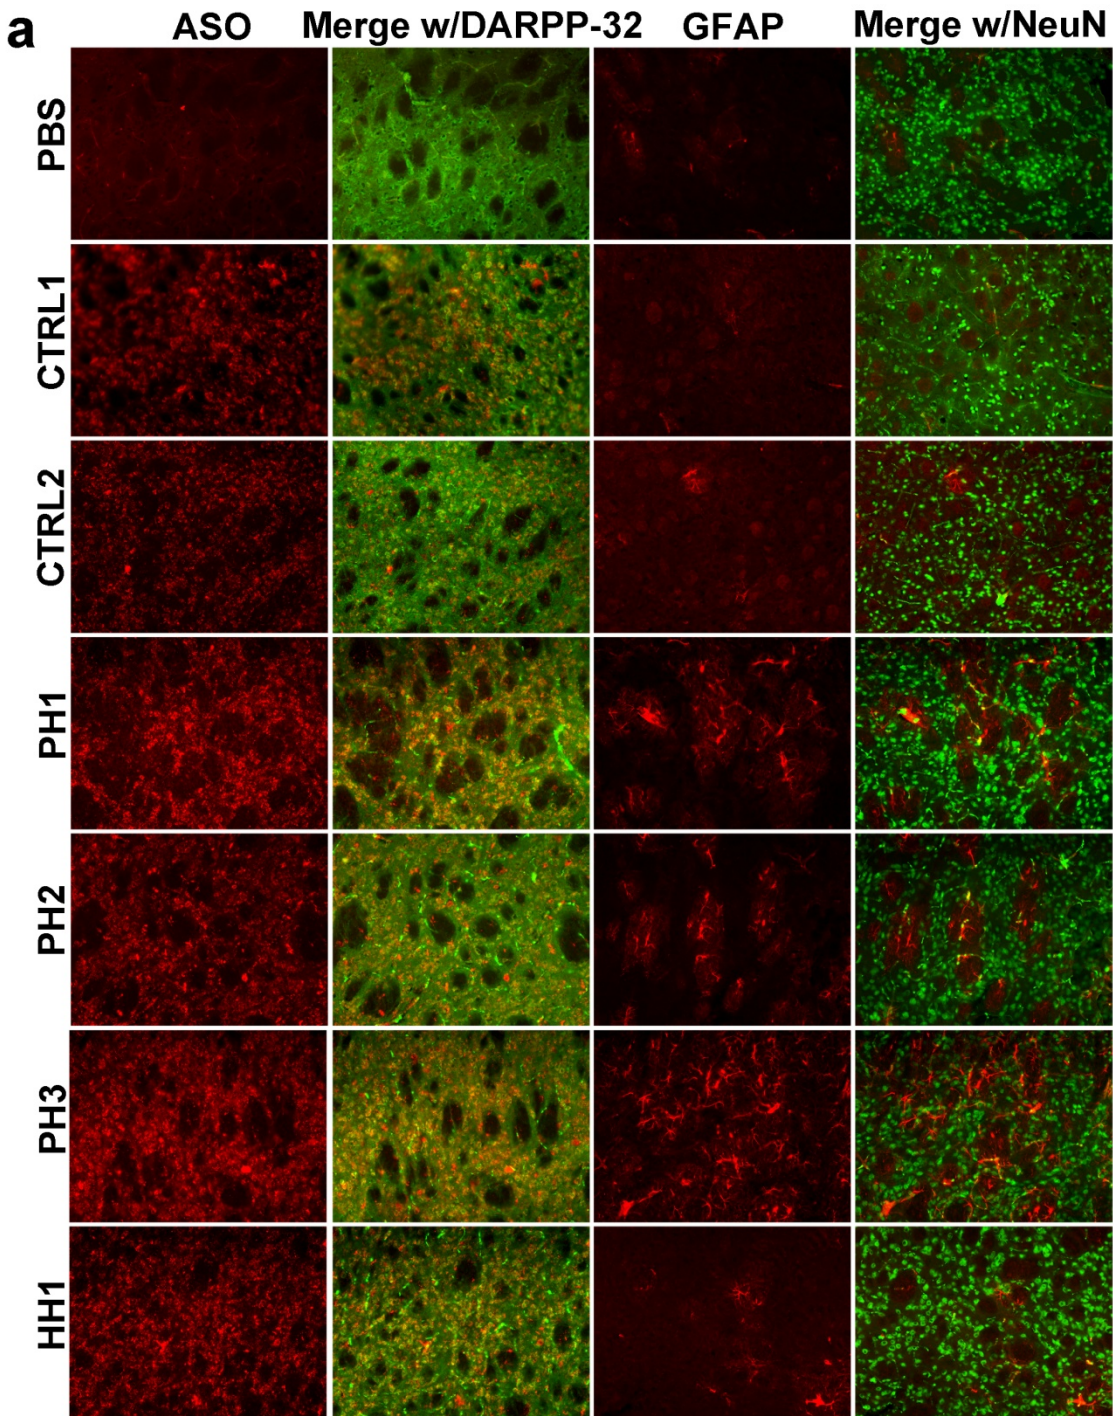

**Figure S1. IHC analysis from primary screen.** 300  $\mu$ g of ASO was delivered to Hu97/18 brains. Four weeks later brains were collected and sectioned in a 2 mm coronal rodent brain matrix. The first section containing mostly olfactory bulb was discarded. The second section was used for HTT quantitation by allelic separation immunoblotting. The remaining posterior portion of the brain was used for immunohistochemical evaluation of ASO distribution and tolerability by DARPP-32, GFAP, and NeuN reactivity. (a) assessment of control and non-selective ASOs. (b) assessment of allele-specific ASOs.



Figure S1b

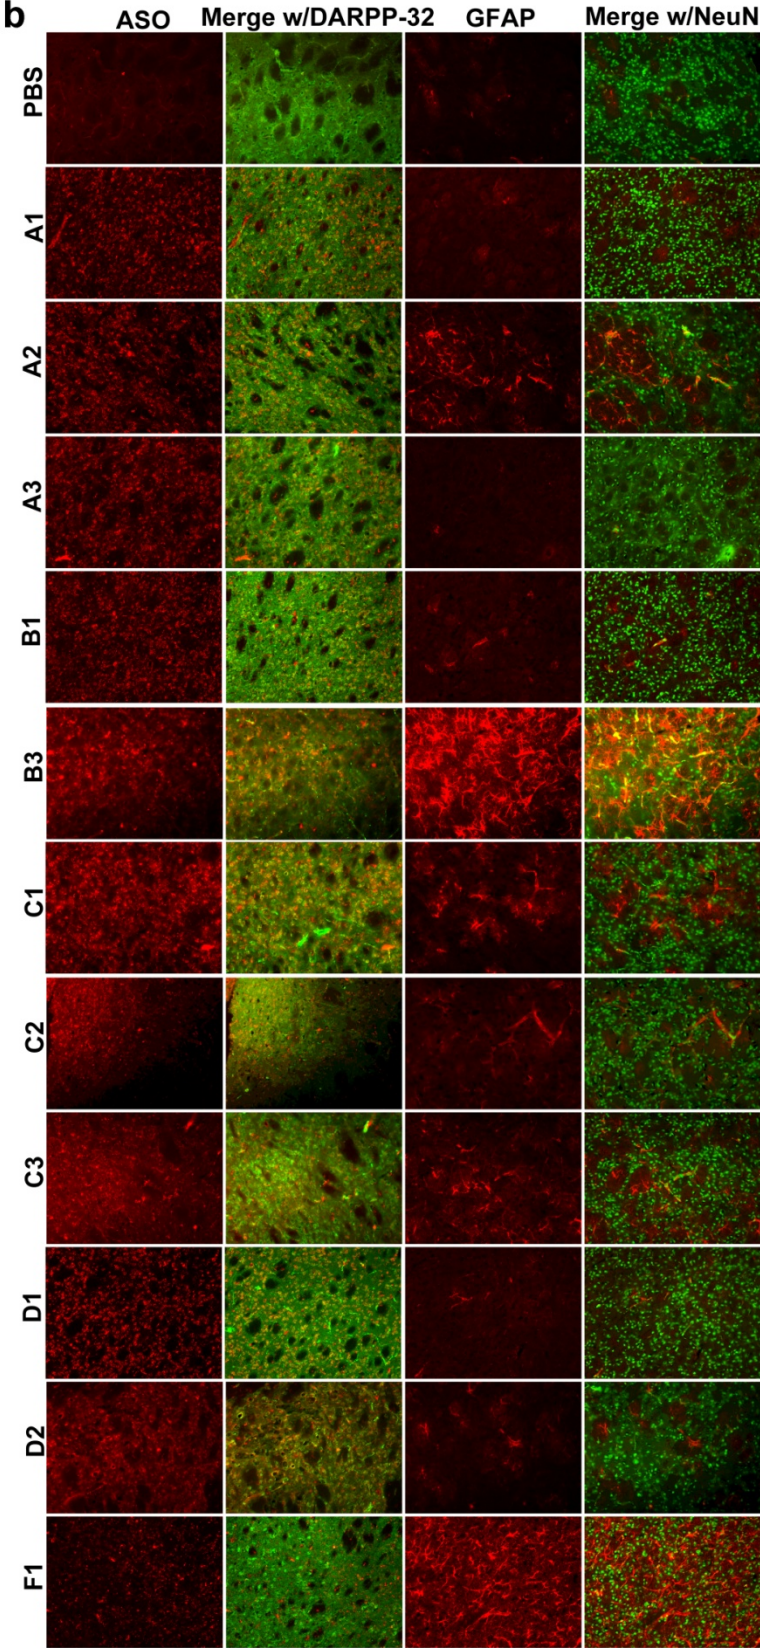

Figure S2

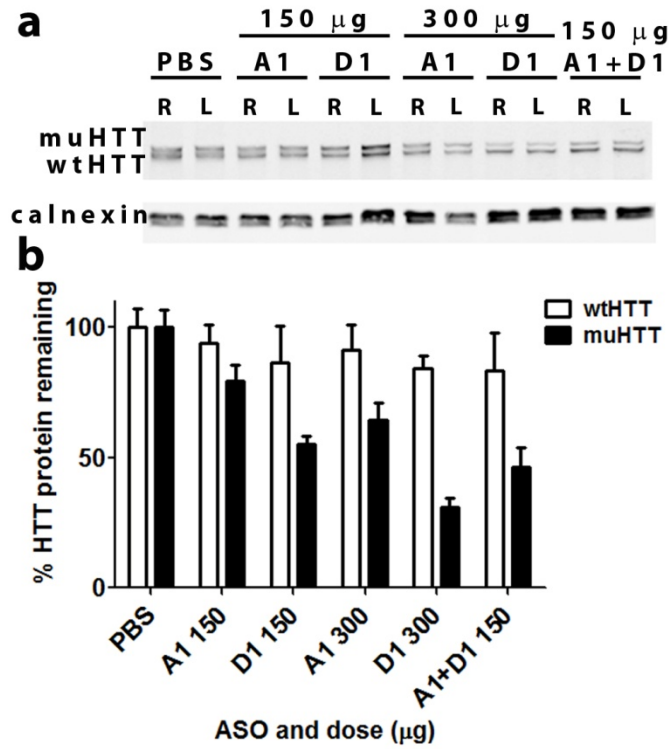

**Figure S2. treating with multiple ASOs does not yield synergistic silencing.** Hu97/18 mice received ICV injections of 150  $\mu$ g ASO A1 or D1, 300  $\mu$ g ASO A1 or D1, or a combination of 150  $\mu$ g each of ASOs A1 and D1. Four weeks later, brains were processed for wt and muHTT levels. (a) Example immunoblot. (b) Density of HTT bands was normalized to calnexin loading control and expressed as a percentage of the same allele (either wtHTT or muHTT) from brain lysates of PBS injected animals. Quantitation of both sides of the brain of 2 animals per condition.



Figure S3

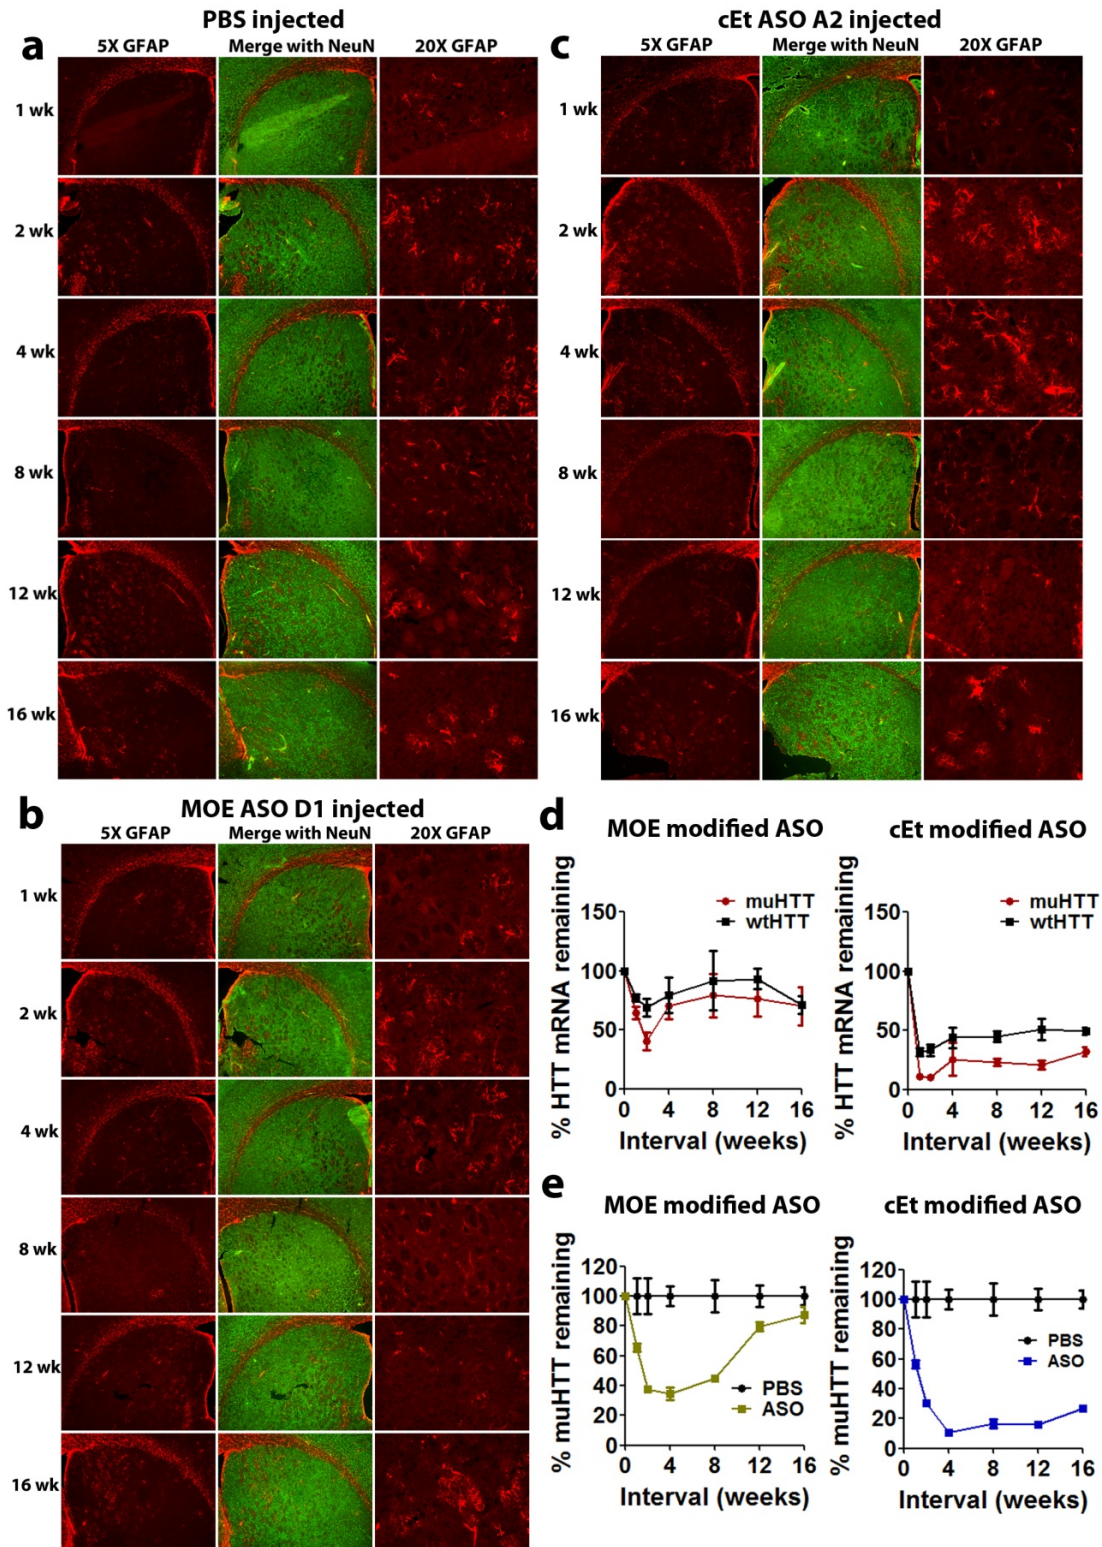

Figure S3. Duration of action of MOE and cEt modified ASOs. Hu97/18 mice were injected ICV with 300  $\mu$ g of MOE-modified ASO D1, cEt-modified ASO A2, or PBS vehicle. Mice were sacrificed at the indicated intervals and brains were processed for GFAP induction by IHC (a, b, c) wt and muHTT mRNA (d), and muHTT protein by FRET(e).

Figure S4a

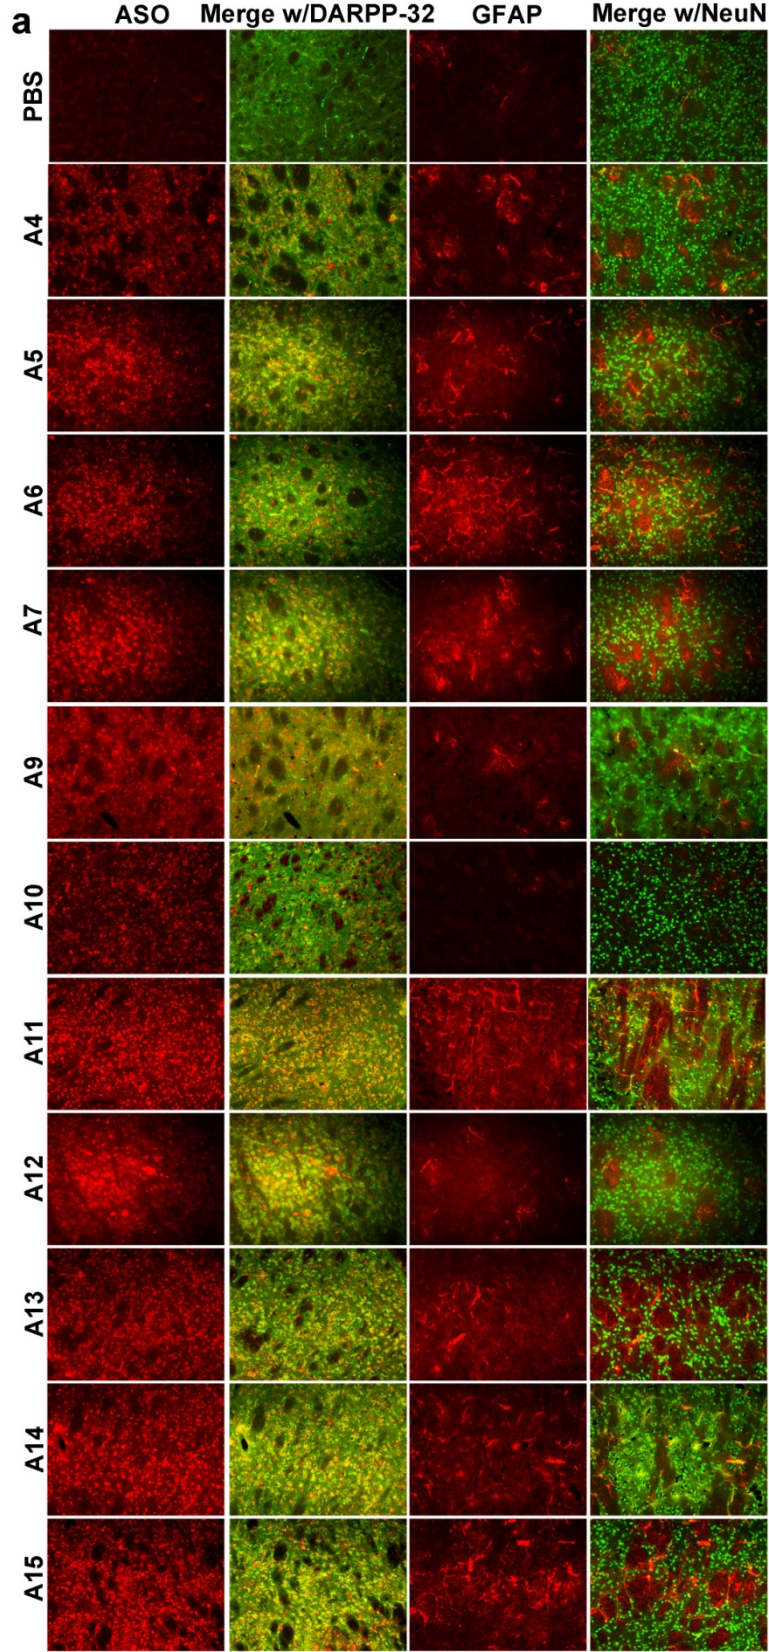



Figure S4b

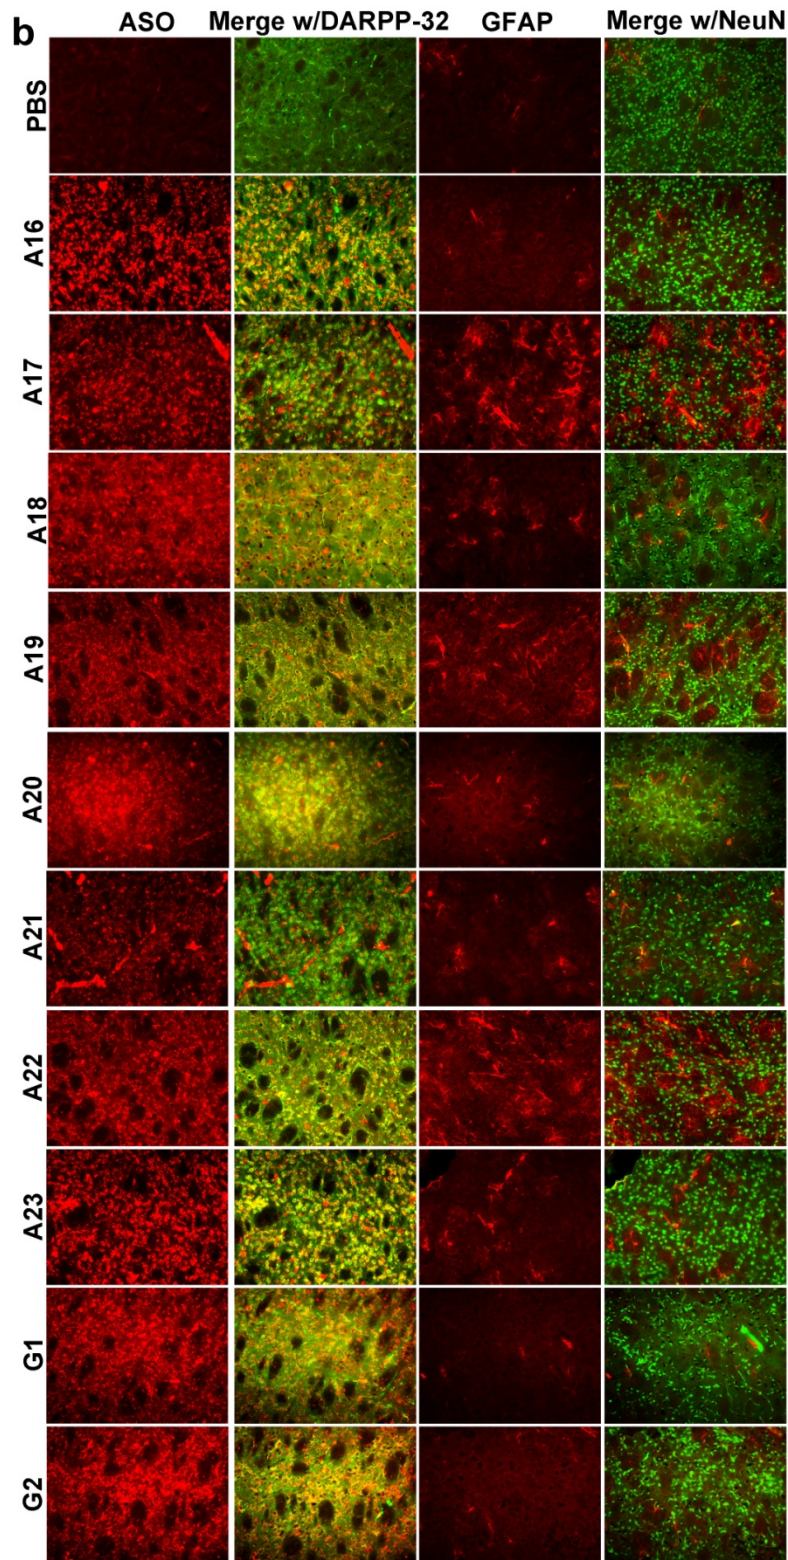

**Figure S4. IHC assessment of secondary screen.** 300  $\mu$ g of ASO was delivered to Hu97/18 brains. Four weeks, later brains were used for immunohistochemical evaluation of ASO distribution and tolerability by DARPP-32, GFAP and NeuN reactivity.



Figure S5

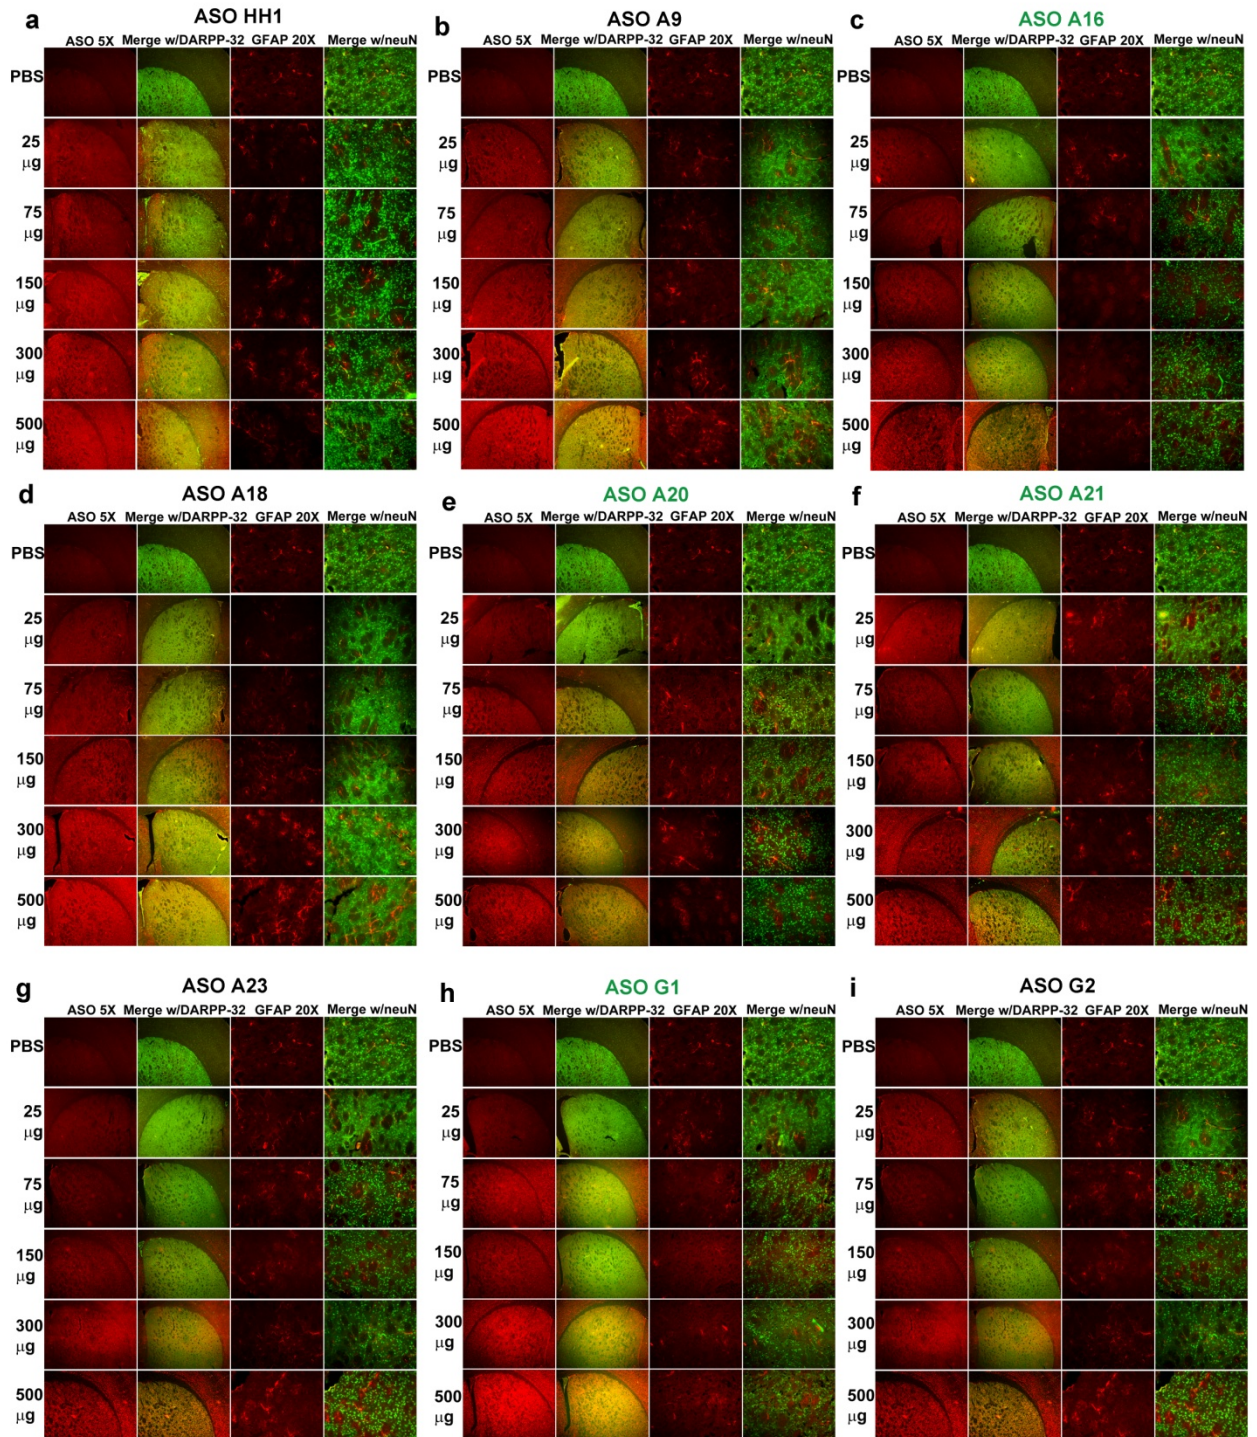

Figure S5. IHC assessment of dose response. ASO was delivered at the indicated doses and brains were processed by IHC for ASO distribution and tolerability by DARPP-32, GFAP, and NeuN reactivity. Lead ASOs that passed all screening and dosing criteria are in Green.
